# Supplementary material for: Graphitic carbon balanced between high plateau capacity and high rate capability for lithium ion capacitors
Source: Royal Society of Chemistry journal article supplement (doi:10.1039/c7ta03862c), 2017-01-01
Supplement: c7ta03862c1.pdf [file c7ta03862c1.pdf]

## Electronic supplementary information

### **Graphitic carbon balanced between high plateau capacity and high rate capability for lithium ion capacitor**

Zhewei Yang, Huajun Guo\*, Xinhai Li, Zhixing Wang, Jiexi Wang, Yansen Wang, Zhiliang Yan, Dongcai Zhang

*School of Metallurgy & Environment, Central South University, Changsha 410083, P. R. China.*

Prepared for submission to **Journal of Materials Chemistry A**

**May 3<sup>th</sup>, 2017**

\* Corresponding author: Tel: +86-731-88836633, Fax: +86-731-88836633

E-mail address: [hjguo\\_csu@163.com](mailto:hjguo_csu@163.com)

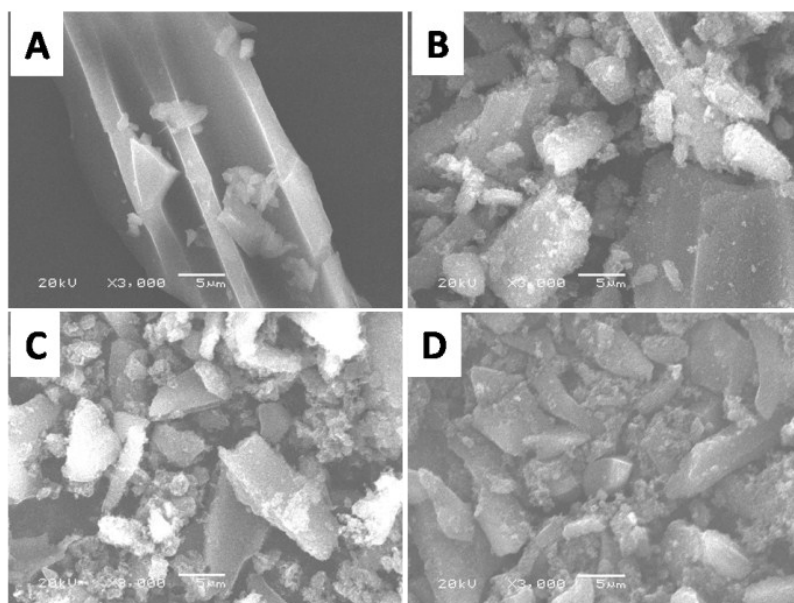

Fig. S1. SEM images of A) C400, B) GC900, C) GC1000 and D) GC1100.

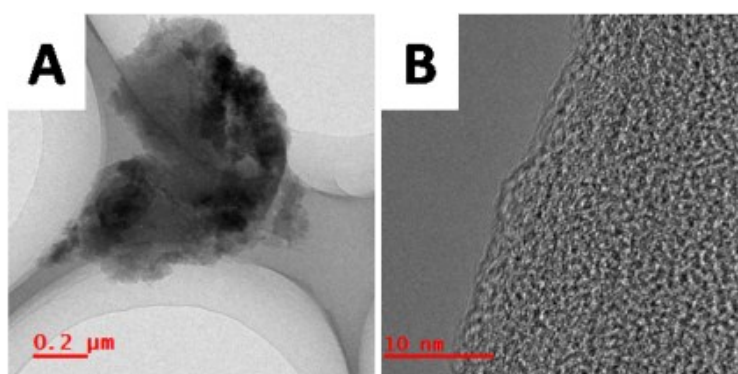

Fig. S2. A) TEM image of C400. B) HRTEM image of C400.

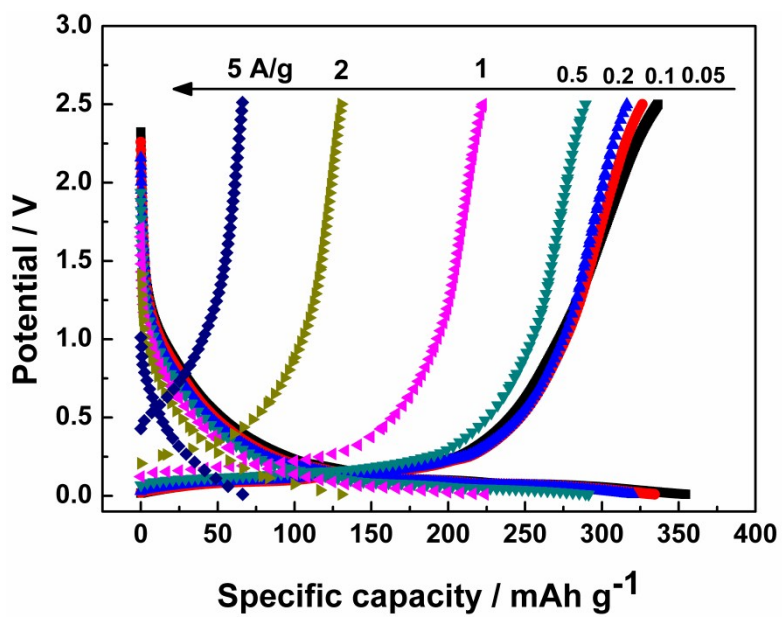

Fig. S3. GCD curves of GC1100 at different current densities.

Table S1 Comparison of the results in our work with other biomass derived carbon in LIBs.

| <b>Biomass</b> | <b>Synthetic method</b>                                     | <b>Reversible capacity (mAh g<sup>-1</sup>)</b> | <b>Initial Coulombic efficiency</b> | <b>Stable plateau (&lt;0.2 V)</b> | <b>References</b> |
|----------------|-------------------------------------------------------------|-------------------------------------------------|-------------------------------------|-----------------------------------|-------------------|
| Coir pith      | Activation (KOH, 850 °C)                                    | 917 (100 mA g <sup>-1</sup> )                   | 44 %                                | No                                | 29                |
| Olive stones   | Activation (Steam)                                          | 220 (74.4 mA g <sup>-1</sup> )                  | 35 %                                | No                                | 30                |
| Cherry tones   | Activation (ZnCl <sub>2</sub> , 500 °C)                     | 415 (74.4 mA g <sup>-1</sup> )                  | 49 %                                | No                                | 30                |
| Pinecone hull  | Charring (800 °C)                                           | 321 (10 mA g <sup>-1</sup> )                    | 48.6 %                              | No                                | 31                |
| Coconut oil    | Flame deposition                                            | 741 (100 mA g <sup>-1</sup> )                   | 50 %                                | No                                | 32                |
| Egg yolk       | Catalysis (KOH+Fe(NO <sub>3</sub> ) <sub>3</sub> , 1000 °C) | 770 (500 mA g <sup>-1</sup> )                   | 62 %                                | No                                | 33                |
| Egg white      | Mesoporous silica template (650 °C)                         | 1780 (100 mA g <sup>-1</sup> )                  | 57 %                                | No                                | 34                |
| Wheat straw    | Graphitization (2600 °C)                                    | 407 (0.1 C)                                     | 62.9 %                              | Yes                               | 23                |
| Sisal fibers   | Catalysis (Ni(NO <sub>3</sub> ) <sub>2</sub> , 1100 °C)     | 354 (50 mA g <sup>-1</sup> )                    | 53 %                                | Yes                               | Our work          |
